# Supplementary material for: Cloning, Synthesis and Functional Characterization of a Novel α-Conotoxin Lt1.3
Source: MDPI journal article supplement (doi:10.3390/md16040112), 2018-03-31
Supplement: s1 [file s1]

## Supplementary Information

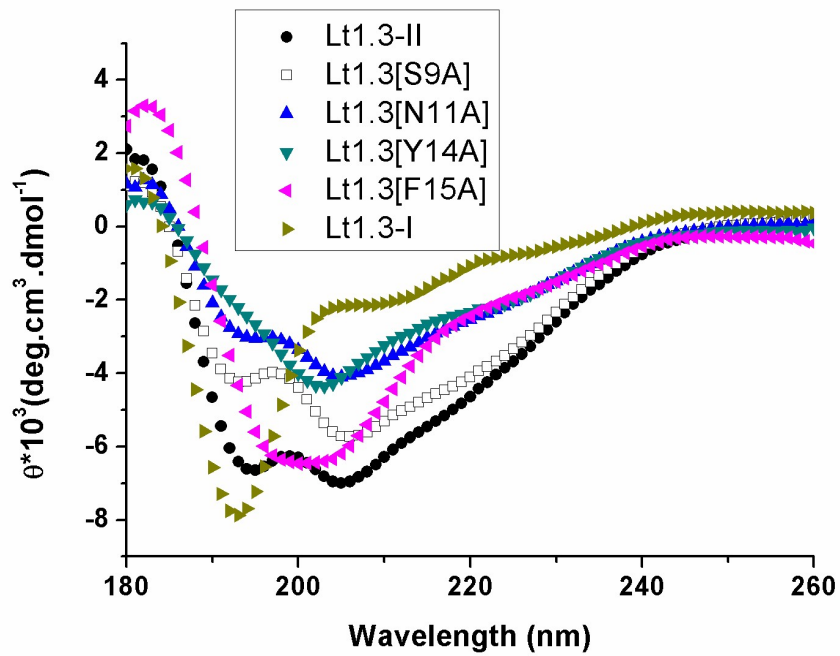

**Figure S1.** CD spectra of Lt1.3 in 0.01 M phosphate buffer solution (pH=7.2)

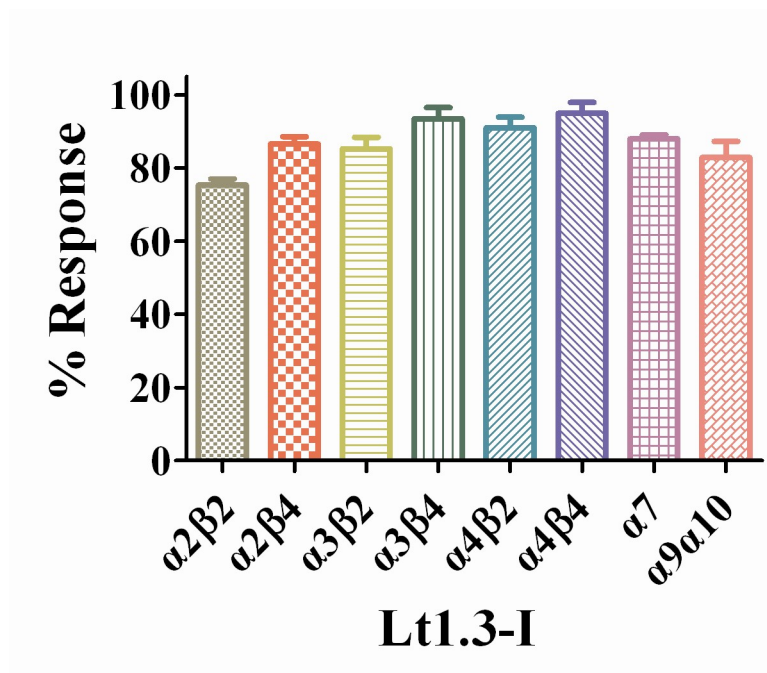

**Figure S2.** Effects of Lt1.3-1 on rat nAChRs expressed in *Xenopus Oocytes*. **The** inhibition ration of 10  $\mu$ M Lt1.3-I for various rat nAChR subtypes was  $< 50\%$  (n = 3-4). The data were expressed as mean  $\pm$  SEM.
